# Supplementary material for: “Just do the ECV, Just do it – This, I call it a Miracle:” Understanding External Cephalic Version Practices at the Largest Teaching Hospital in Ghana
Source: Research Square preprint supplement (doi:10.21203/rs.3.rs-8347543/v1), 2025-12-30
Supplement: Supplementary file 1 [file 098e13afaea5c68d5f86fe7c.docx]

Clinician interview guide

a. Affective attitude

i. Please walk me through your thought process in deciding to offer an ECV (or not) to patient XXX (reference to the patient they are being interviewed for).

ii. Please walk me through your general thought process in deciding to offer an ECV or not.

b. Burden

i. How do you feel that offering and/or performing an ECV impacted (or would’ve impacted) your patient’s pregnancy and care?

ii. If your patient had a postpartum hemorrhage, would you feel comfortable recommending an autologous blood transfusion if available?

i. Why or why not?

c. Ethicality

i. How does your culture and personal values impact your choice to offer and perform an ECV?

d. Intervention coherence

i. Can you please discuss what you understand about how an ECV works?

ii. Can you please discuss what you understand about potential complications from an ECV?

e. Opportunity costs

i. What negative effects do you believe ECV had (or would’ve had) on your patient’s pregnancy and care?

f. Perceived effectiveness

i. What do you feel would be different about this procedure if a midwife performed it versus you?

ii. How do you feel your training has impacted your ability to perform this procedure?

i. What can be improved in your training?

g. Self-efficacy

i. Did you face any challenges in performing an ECV?

ii. If so, how did you overcome them?

h. Additional question:

i. From your experience, how do ECV practices at KBTH differ from other hospitals nearby?

ii. Is there anything else you would like us to know about your experience performing ECVs?
