# Supplementary material for: “Just do the ECV, Just do it – This, I call it a Miracle:” Understanding External Cephalic Version Practices at the Largest Teaching Hospital in Ghana
Source: Research Square preprint supplement (doi:10.21203/rs.3.rs-8347543/v1), 2025-12-30
Supplement: Supplementary file 2 [file a0854684b49ae826f0902316.docx]

Patient semi-structured interview guide – ECV not offered

a. Current situation

A. Can you describe how and when your breech presentation or malpresentation was initially identified?

B. Were any options, including ECV, discussed with you at that time?

C. What reasons were provided for not offering ECV?

1. Was there a specific rationale given?

a. Intervention coherence

a. Can you please discuss what you understand about an ECV?

b. What are the complications of an ECV?

C. How would you describe the communication with your healthcare team regarding your options and the decision-making process?

b. Affective attitude

a. What would your thoughts have been if you had been given the option to have an ECV?

1. How did you feel emotionally about not being offered ECV and the delivery experience?

c. Burden

a. How do you feel your pregnancy and care would have been impacted by having an ECV?

b. What do you think the benefits would have been?

c. If you had a postpartum hemorrhage, would you accept your own blood lost during the delivery for transfusion after being cleaned? Why or why not?

d. Ethicality

a. Would your culture and values have influenced your choice to get an ECV?

e. Opportunity costs

a. What negative effects do you believe ECV had (or would’ve had) on your pregnancy and care?

1. Did you experience any complications or issues related to the breech presentation or delivery method?

f. Perceived effectiveness

a. How would you feel if a midwife performed this procedure instead of a doctor?

B. Were you dissatisfied with your care?

C. If so, can you please tell me more about it?

g. Self-efficacy

a. Do you think you would have faced any challenges in coming to your ECV appointment?

b. What were they?

c. How would you have overcome them?

h. Additional question:

1. What advice would you offer to other patients who might face a similar situation regarding ECV and breech presentation?
2. Is there anything else you would like us to know about your experience with your baby’s malpresentation or ECV?
