# Supplementary material for: “Just do the ECV, Just do it – This, I call it a Miracle:” Understanding External Cephalic Version Practices at the Largest Teaching Hospital in Ghana
Source: Research Square preprint supplement (doi:10.21203/rs.3.rs-8347543/v1), 2025-12-30
Supplement: Supplementary file 3 [file d0d0576c654597435be13c3a.docx]

Patient interview guide – offered ECV

a. Current situation

A. Can you describe how and when your breech presentation or malpresentation was initially identified?

B. Were any options, including ECV, discussed with you at that time?

C. What reasons were provided for offering ECV?

1. Was there a specific rationale given?

A. Intervention coherence

a. Can you please discuss what you understand about an ECV?

1. What are the complications of an ECV?
2. How would you describe the communication with your healthcare team regarding your options and the decision-making process?
3. Were you provided with enough information during the procedure?
4. (if declined) Can you describe the factors that influenced your decision to decline the ECV?
   1. Was it related to concerns about the procedure itself, potential risks, or personal preferences?
   2. Were there specific fears or reservations you had about the procedure?
   3. What alternatives to ECV were discussed or implemented after you declined the procedure?

b. Affective attitude

a. Please walk me through your thoughts in deciding to pursue an ECV or not.

B. How did you feel emotionally about being offered ECV/declining ECV and the delivery experience?

C. How did the procedure affect you emotionally? Did you have any anxiety or stress related to the procedure or its outcome?

c. Burden

a. How do you feel your pregnancy and care were impacted (or would have been impacted) by having an ECV?

b. What do you think the benefits were?

c. If you had a postpartum hemorrhage, would you accept your own blood lost during the delivery for transfusion after being cleaned? Why or why not?

d. Ethicality

a. How does your culture and values influence your choice to get an ECV?

e. Opportunity costs

a. What negative effects do you believe ECV had (or would’ve had) on your pregnancy and care?

B. Did you experience any complications or issues related to the breech presentation or delivery method?

f. Perceived effectiveness

a. How would you feel if a midwife performed this procedure instead of a doctor?

B. Were you dissatisfied with your care?

C. If so, can you please tell me more about it?

D. How did the ECV procedure go from your perspective?

E. How would you describe the level of pain or discomfort experienced during the procedure?

I. Was it managed effectively?

g. Self-efficacy

a. Did you face any challenges in attending your ECV appointment?

b. What were they?

c. How did you overcome them?

h. Additional question:

1. What advice would you offer to other patients who might face a similar situation regarding ECV and breech presentation?
2. Is there anything else you would like us to know about your experience with your baby’s malpresentation or ECV?
